# Supplementary material for: Endometrial apoptosis and neutrophil infiltration during menstruation exhibits spatial and temporal dynamics that are recapitulated in a mouse model
Source: PubMed Central journal article supplement (PMC5727295; doi:10.1038/s41598-017-17565-x), 2017-12-12
Supplement: 41598_2017_17565_MOESM1_ESM.pdf [file 41598_2017_17565_MOESM1_ESM.pdf]

**Endometrial apoptosis and neutrophil infiltration during menstruation exhibits spatial and temporal dynamics that are recapitulated in a mouse model**

**Gregory M Armstrong, Jacqueline A Maybin, Alison A Murray, Moira Nicol, Catherine Walker, Philippa TK Saunders, Adriano G Rossi and Hilary OD Critchley**

**Supplementary Data:** Tables (1), Figures (2)

## Supplementary Table 1

### Immunohistochemistry

| Laboratory Code | Cycle Day | Cycle Min./Max. (days) | Histological Stage       | Serum [E2] (pM) | Serum [P4] (nM) |
|-----------------|-----------|------------------------|--------------------------|-----------------|-----------------|
| AR169           | 21 (-5)   | 21/28                  | Late Secretory           | 819             | 6.37            |
| AR172           | 24 (-5)   | 28/28                  | Mid Secretory            | 1949            | 94.25           |
| AR103           | 25 (-4)   | 28/28                  | Late Secretory           | 467             | 17.6            |
| AR189           | 26 (-3)   | 28/28                  | Late Secretory           | 176             | 11.29           |
| AR218           | 29 (-2)   | 28/32                  | Late Secretory           | 168             | 4.44            |
| AR180           | 28 (-1)   | 28/28                  | Late Secretory           | 275             | 5.3             |
| AR104           | 33 (-1/0) | 30/31                  | Late Secretory           | 495             | 22              |
| AR196           | 1         | -                      | Late Secretory/Menstrual | 392             | 3.06            |
| AR129           | 1         | -                      | Menstrual                | 151             | 4.31            |
| AR211           | 2         | -                      | Menstrual                | 153             | 1.61            |
| AR214           | 2         | -                      | Menstrual                | 176             | 2.55            |
| CT1185EM        | 3         | -                      | Menstrual                | 242             | <3              |
| AR212           | 5         | -                      | Weakly Proliferative     | 104             | 2.47            |
| AR161           | 6         | -                      | Proliferative            | 318             | 2.6             |
| AR223           | 7         | -                      | Late Proliferative       | 340             | 6.38            |
| CT892EM         | 7         | -                      | Proliferative            | 424             | <3              |
| CT2015EM        | 8         | -                      | Proliferative            | 607             | <3              |
| CT787EM2        | 8         | -                      | Proliferative            | 928             | <3              |
| CA748EM         | 8         | -                      | Proliferative            | 215             | <3              |
| AR136           | 9         | -                      | Mid Proliferative        | 1002            | 13.68           |
| CT1215EM        | 10        | -                      | Proliferative            | 275             | <3              |
| AR118           | 10        | -                      | Mid Proliferative        | 311             | 1.4             |
| CT1148EM        | 11        | -                      | Proliferative            | 372             | <3              |
| AR125           | 11        | -                      | Mid Proliferative        | 842             | 7.1             |

### RT-qPCR

| Laboratory Code | Cycle Day | Cycle Min./Max. (days) | Histological Stage | Serum [E2] (pM) | Serum [P4] (nM) |
|-----------------|-----------|------------------------|--------------------|-----------------|-----------------|
| CA85E           | 23        | -                      | Late Secretory     | 90.6            | 11.51           |
| CH325E          | 28        | -                      | Late Secretory     | 427.6           | 19.84           |
| CH315E          | 2         | -                      | Menstrual          | 108             | 3.16            |
| CT1142E         | 2         | -                      | Menstrual          | 129             | <3              |
| CT1185E         | 3         | -                      | Menstrual          | 242             | <3              |
| CH1004E         | 5         | -                      | Menstrual          | 140             | <3              |
| CT1370E         | 6         | -                      | Proliferative      | 260.11          | <3              |
| CT1070E         | 7         | -                      | Proliferative      | 270             | <3              |
| CT1114E         | 7         | -                      | Proliferative      | 215             | <3              |
| CH996E          | 8         | -                      | Proliferative      | 672             | <3              |
| CT1384E         | 11        | -                      | Proliferative      | 879.31          | <3              |

**Patient sample details for ‘full-thickness’ (uterine lumen to myometrial/endometrial junction) and ‘Pipelle’ endometrial biopsies used for immunohistochemical and RT-qPCR studies.** Cycle day determined from last menstrual period reported by patient, or by subtracting from the mean of reported cycle minima/maxima (given in parentheses); histological stage determined by pathologist. E2 = oestradiol, nM = nanomolar, pM = picomolar, P4 = progesterone.

## Supplementary Figure 1

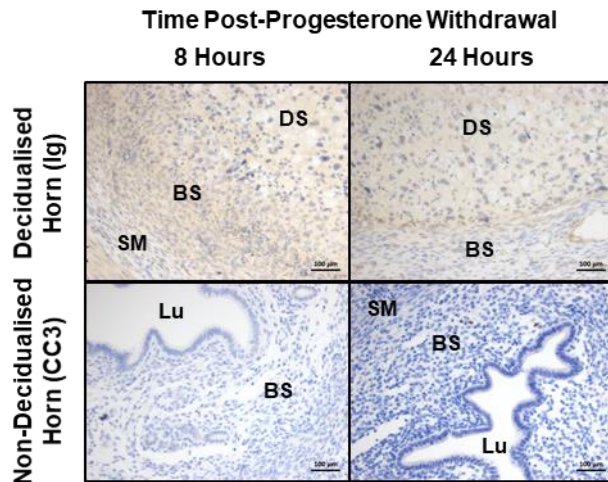

**Isotype negative controls (top) show no staining, and non-decidualised tissue controls (bottom) show no CC3 immunoreactivity, confirming “menstrual” apoptotic changes are decidualisation-specific.** Negative controls for Fig. 3a (cleaved-caspase-3-immunostained mouse endometrium). Photomicrographs of mouse uterus (decidualised horn) tissue sections from 8h and 24h after progesterone withdrawal, incubated with non-immunised rabbit Ig fraction in place of anti-cleaved caspase-3 antibody (top); and of mouse uterus (non-decidualised horn) tissue sections from 8h and 24h after progesterone withdrawal, incubated with anti-cleaved caspase-3 antibody (bottom).  
BS = basal stroma, DS = decidualised stroma, Lu = lumen, SM = smooth muscle.

## Supplementary Figure 2

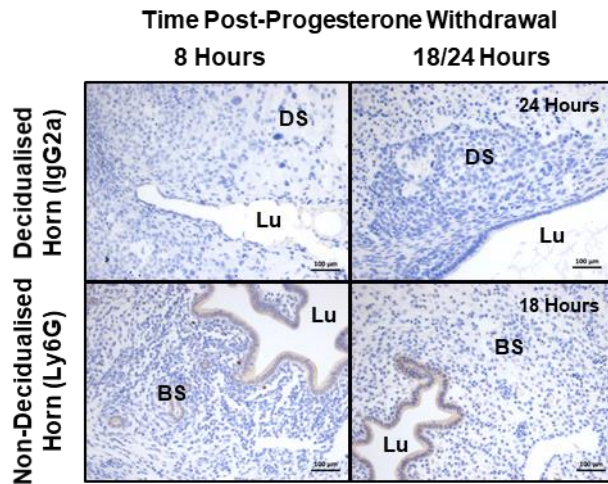

**Isotype negative controls (top) show no staining, and non-decidualised tissue controls (bottom) show negligible Ly6G-immunopositive leukocytes, confirming “menstrual” neutrophil infiltration is decidualisation-specific.** Negative controls for Fig. 5a (Ly6G-immunostained mouse endometrium). Photomicrographs of mouse uterus (decidualised horn) tissue sections from 8h and 24h after progesterone withdrawal, incubated with rat IgG2a in place of anti-Ly6G antibody (top); and of mouse uterus (non-decidualised horn) tissue sections from 8h and 18h after progesterone withdrawal, incubated with anti-Ly6G antibody (bottom).

BS = basal stroma, DS = decidualised stroma, Lu = lumen.
